# Supplementary material for: Enhancing catalytic performance of AuPd catalysts towards the direct synthesis of H2O2 through incorporation of base metals
Source: Royal Society of Chemistry journal article supplement (doi:10.1039/d1cy01962g), 2022-01-01
Supplement: d1cy01962g1.pdf [file d1cy01962g1.pdf]

## Supplementary Information.

### Enhancing catalytic performance of AuPd catalysts towards the direct synthesis of H<sub>2</sub>O<sub>2</sub> through incorporation of base metals.

Alexandra Barnes<sup>[a] †</sup>, Richard J. Lewis<sup>[a]\*</sup>, David J. Morgan<sup>[a], [b]</sup>, Thomas E. Davies<sup>[a]</sup> and Graham J. Hutchings<sup>[a]\*</sup>

<sup>[a]</sup>Max Planck–Cardiff Centre on the Fundamentals of Heterogeneous Catalysis FUNCAT, Cardiff Catalysis Institute, School of Chemistry, Cardiff University, Main Building, Park Place, Cardiff, CF10 3AT, UK.

<sup>[b]</sup>Harwell XPS, Research Complex at Harwell (RCaH) Didcot, OX11 0FA, UK

† These authors contributed equally to this work.

\*LewisR27@cardiff.ac.uk, Hutch@cardiff.ac.uk

**Table S.1.** Synthesis details of the precursors used in the preparation of key mono-, bi- and tri-metallic 1%AuPdX/TiO<sub>2</sub> catalysts.

| Catalyst                                                          | Au precursor                          | Precursor vol. / $\mu\text{L}$ ( $\text{mgmL}^{-1}$ ) | Pd precursor      | Precursor vol. / $\mu\text{L}$ ( $\text{mgmL}^{-1}$ ) | Tertiary metal precursor                             | Precursor vol. / $\mu\text{L}$ ( $\text{mgmL}^{-1}$ ) |
|-------------------------------------------------------------------|---------------------------------------|-------------------------------------------------------|-------------------|-------------------------------------------------------|------------------------------------------------------|-------------------------------------------------------|
| 1%Au/TiO <sub>2</sub>                                             | HAuCl <sub>4</sub> .3H <sub>2</sub> O | 816 (12.25)                                           | -                 | -                                                     | -                                                    | -                                                     |
| 1%Pd/TiO <sub>2</sub>                                             | -                                     | -                                                     | PdCl <sub>2</sub> | 1667 (6.00)                                           | -                                                    | -                                                     |
| 1%AuPd <sub>(1.00)</sub> /TiO <sub>2</sub>                        | HAuCl <sub>4</sub> .3H <sub>2</sub> O | 530 (12.25)                                           | PdCl <sub>2</sub> | 585 (6.00)                                            | -                                                    | -                                                     |
| 1%AuPd <sub>(0.975)</sub> Pt <sub>(0.025)</sub> /TiO <sub>2</sub> | HAuCl <sub>4</sub> .3H <sub>2</sub> O | 517 (12.25)                                           | PdCl <sub>2</sub> | 570 (6.00)                                            | H <sub>2</sub> PtCl <sub>6</sub> .6H <sub>2</sub> O  | 231 (1.08)                                            |
| 1%AuPd <sub>(0.975)</sub> Ni <sub>(0.025)</sub> /TiO <sub>2</sub> | HAuCl <sub>4</sub> .3H <sub>2</sub> O | 517 (12.25)                                           | PdCl <sub>2</sub> | 570 (6.00)                                            | Ni(NO <sub>3</sub> ) <sub>2</sub>                    | 115 (2.18)                                            |
| 1%AuPd <sub>(0.975)</sub> Sn <sub>(0.025)</sub> /TiO <sub>2</sub> | HAuCl <sub>4</sub> .3H <sub>2</sub> O | 517 (12.25)                                           | PdCl <sub>2</sub> | 570 (6.00)                                            | SnCl <sub>2</sub>                                    | 52 (4.84)                                             |
| 1%AuPd <sub>(0.975)</sub> Cu <sub>(0.025)</sub> /TiO <sub>2</sub> | HAuCl <sub>4</sub> .3H <sub>2</sub> O | 517 (12.25)                                           | PdCl <sub>2</sub> | 570 (6.00)                                            | CuCl <sub>2</sub>                                    | 106 (2.36)                                            |
| 1%AuPd <sub>(0.975)</sub> Co <sub>(0.025)</sub> /TiO <sub>2</sub> | HAuCl <sub>4</sub> .3H <sub>2</sub> O | 517 (12.25)                                           | PdCl <sub>2</sub> | 570 (6.00)                                            | CoCl <sub>2</sub> .6H <sub>2</sub> O                 | 49 (5.10)                                             |
| 1%AuPd <sub>(0.975)</sub> In <sub>(0.025)</sub> /TiO <sub>2</sub> | HAuCl <sub>4</sub> .3H <sub>2</sub> O | 517 (12.25)                                           | PdCl <sub>2</sub> | 570 (6.00)                                            | InCl <sub>3</sub>                                    | 49 (5.11)                                             |
| 1%AuPd <sub>(0.975)</sub> Ga <sub>(0.025)</sub> /TiO <sub>2</sub> | HAuCl <sub>4</sub> .3H <sub>2</sub> O | 517 (12.25)                                           | PdCl <sub>2</sub> | 570 (6.00)                                            | Ga(NO <sub>3</sub> ) <sub>3</sub> .xH <sub>2</sub> O | 45 (5.50)                                             |
| 1%AuPd <sub>(0.975)</sub> Zn <sub>(0.025)</sub> /TiO <sub>2</sub> | HAuCl <sub>4</sub> .3H <sub>2</sub> O | 517 (12.25)                                           | PdCl <sub>2</sub> | 570 (6.00)                                            | Zn(NO <sub>3</sub> ) <sub>2</sub> .6H <sub>2</sub> O | 46 (5.43)                                             |

**Note1** : In the case of the tri-metallic catalysts the combined loading of Au and Pd is 0.975 wt.% (Au: Pd = (1:1 mol/mol)) and that of the tertiary metal (Pt, Ni, Sn, Cu, Co, In, Ga or Zn) is 0.025 wt.%. In all cases catalyst are exposed to an oxidative heat treatment prior to use (static air, 3 h, 400 °C, 10°Cmin<sup>-1</sup>). **Note 2**: Values in parentheses refer to metal loading of (Au+Pd) or tertiary metal. In all instances total metal loading is 1 wt.% and Au: Pd: X = 1: 1 (mol/mol).

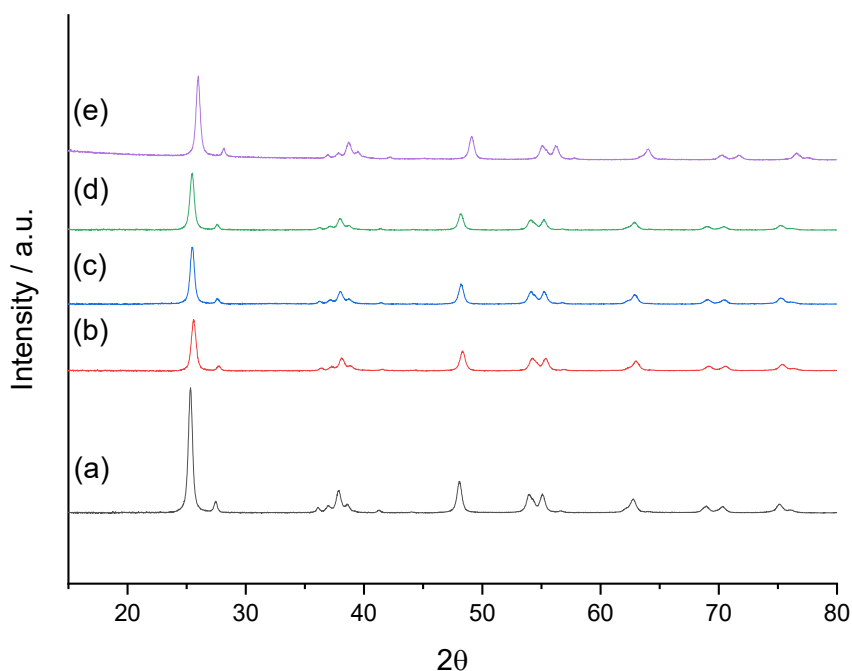

**Figure S.1.** X-ray diffractograms of 1%AuPd<sub>(0.975)</sub>X<sub>(0.025)</sub>/TiO<sub>2</sub> catalysts, prepared by sol-immobilisation. **(a)** TiO<sub>2</sub>, **(b)** 1%AuPd<sub>(1.00)</sub>/TiO<sub>2</sub>, **(c)** 1%AuPd<sub>(0.975)</sub>Ni<sub>(0.025)</sub>/TiO<sub>2</sub>, **(d)** 1%AuPd<sub>(0.975)</sub>Cu<sub>(0.025)</sub>/TiO<sub>2</sub> and **(e)** 1%AuPd<sub>(0.975)</sub>Zn<sub>(0.025)</sub>/TiO<sub>2</sub>. **Note 1:** No reflections associated with immobilised metal species are observed in any of the as-prepared catalysts. ICDD patterns are provided for reference (TiO<sub>2</sub> anatase ICDD: 01-089-4921, TiO<sub>2</sub> rutile ICDD:07-089-0555). **Note 2:** All catalysts exposed to an oxidative heat treatment (400 °C, 3 h, static air, ramp rate = 10°Cmin<sup>-1</sup>).

**Table S.2.** Actual metal loading of 1%AuPd<sub>(0.975)</sub>X<sub>(0.025)</sub>/TiO<sub>2</sub> catalysts, as determined by ICP-OES microwave assisted HF digestion.

| Catalyst                                                          | Theoretical loading / wt.% |       |       | Actual loading / wt.% |       |       |
|-------------------------------------------------------------------|----------------------------|-------|-------|-----------------------|-------|-------|
|                                                                   | Au                         | Pd    | X     | Au                    | Pd    | X     |
| 1%AuPd <sub>(1.00)</sub> /TiO <sub>2</sub>                        | 0.649                      | 0.351 | -     | 0.645                 | 0.437 | -     |
| 1%AuPd <sub>(0.975)</sub> Ni <sub>(0.025)</sub> /TiO <sub>2</sub> | 0.633                      | 0.342 | 0.025 | 0.640                 | 0.416 | 0.001 |
| 1%AuPd <sub>(0.975)</sub> Cu <sub>(0.025)</sub> /TiO <sub>2</sub> | 0.633                      | 0.342 | 0.025 | 0.644                 | 0.415 | 0.002 |
| 1%AuPd <sub>(0.975)</sub> Zn <sub>(0.025)</sub> /TiO <sub>2</sub> | 0.633                      | 0.342 | 0.025 | 0.637                 | 0.405 | 0.001 |

**Note:** Values in parentheses refer to metal loading of (Au+Pd) or tertiary metal. In all instances total metal loading is 1 wt.% and Au: Pd: X = 1: 1 (mol/mol).

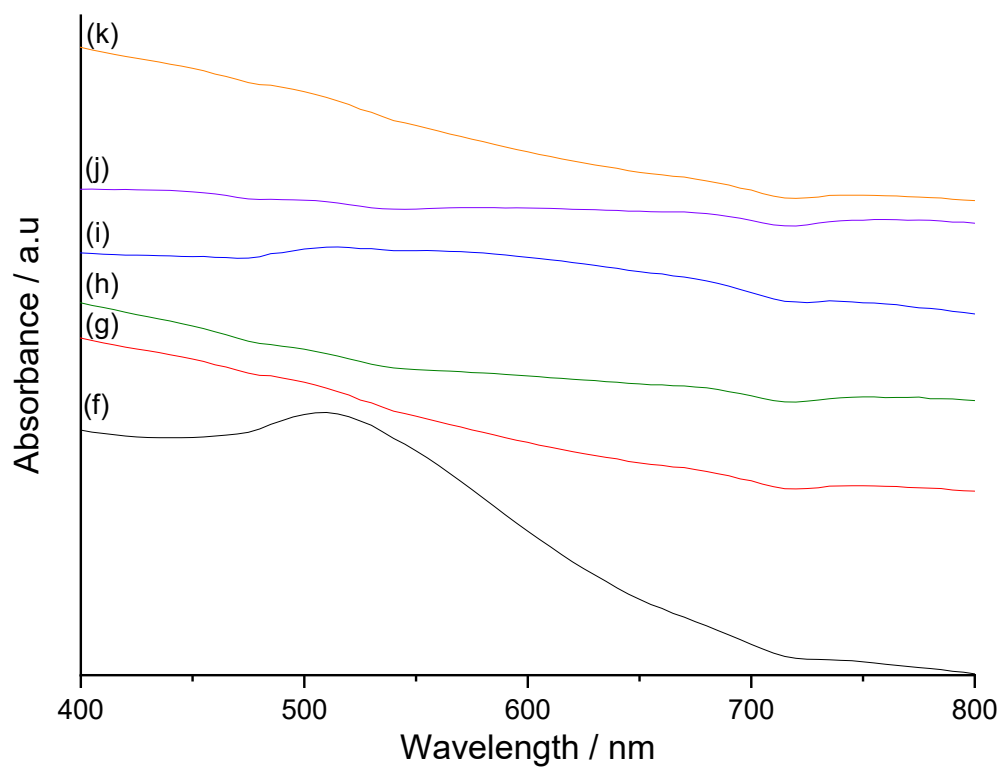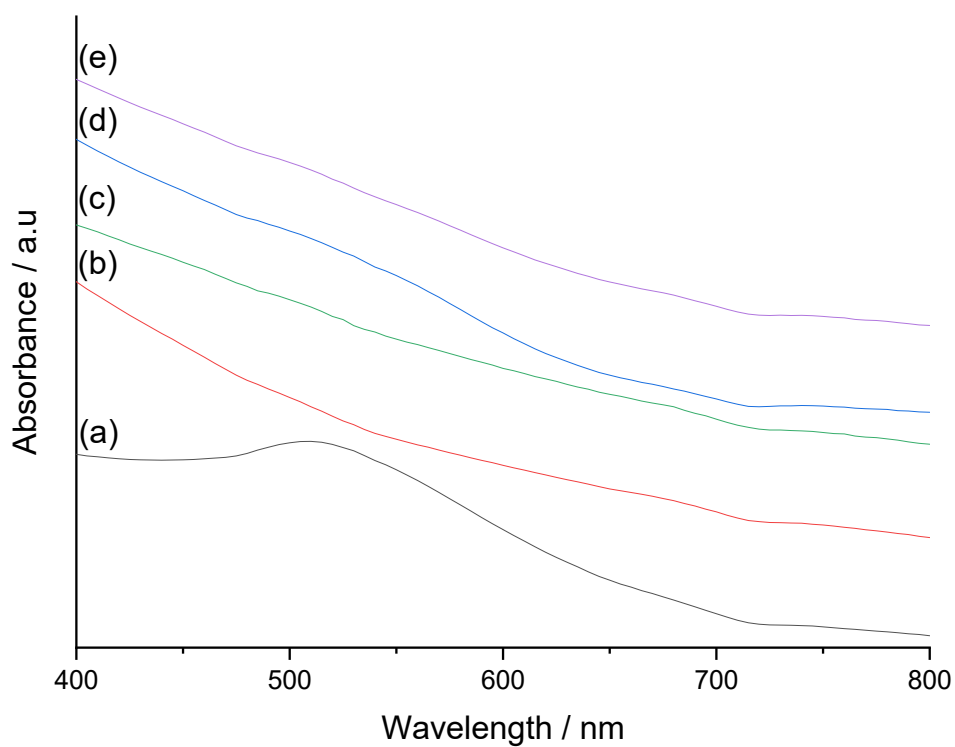

**Figure S.2.** Representative UV-vis spectra from aqueous sol-immobilisation prepared bi-metallic Au-based colloids. **(a)** Au, **(b)** AuPd, **(c)** AuCu, **(d)** AuZn and **(e)** AuNi, **(f)** Au, **(g)** AuCo, **(h)** AuPt, **(i)** AuGa, **(j)** AuIn, **(k)** AuSn. The absence of the Au plasmon peak (at approx. 520 nm) in the bimetallic colloids is indicative of alloy formation.

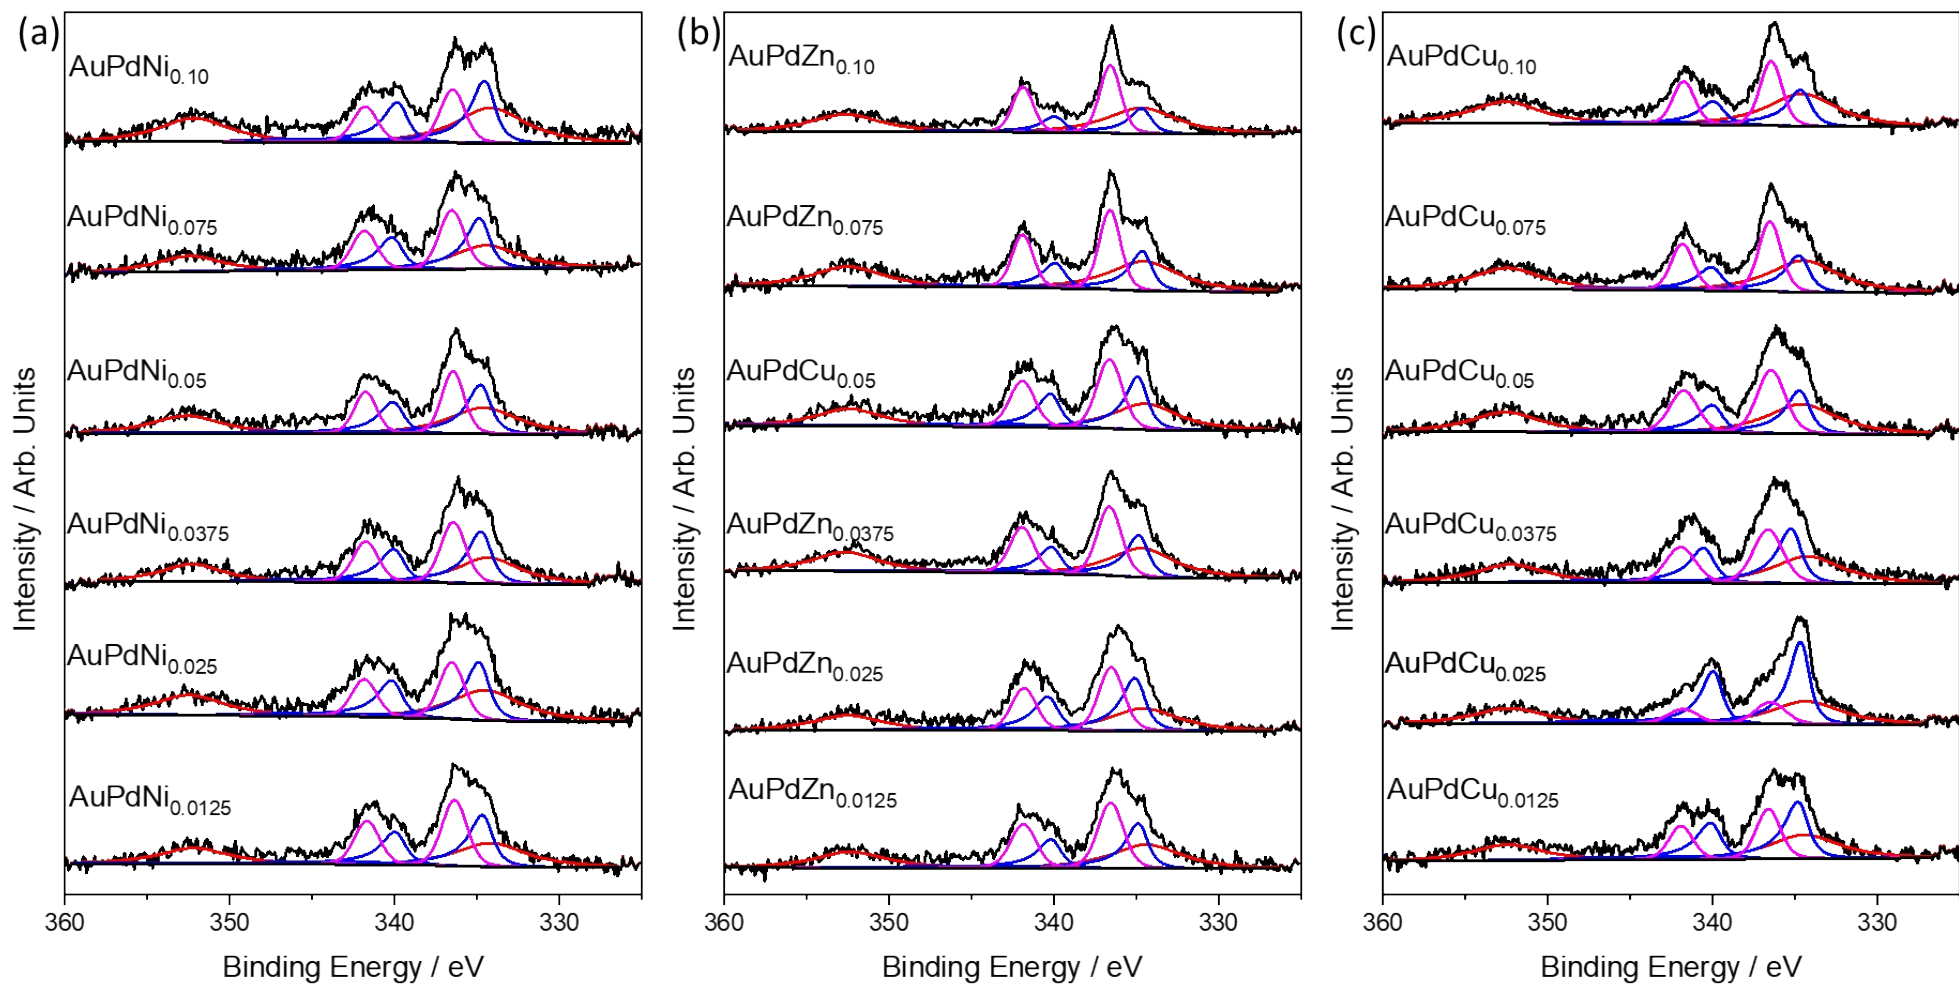

**Figure S.3.** XPS spectra of Pd(3d) regions for as-prepared **(a)** 1%AuPd<sub>(x)</sub>Ni<sub>(1-x)</sub>/TiO<sub>2</sub>, **(b)** 1%AuPd<sub>(x)</sub>Zn<sub>(1-x)</sub>/TiO<sub>2</sub> and **(c)** 1%AuPd<sub>(x)</sub>Cu<sub>(1-x)</sub>/TiO<sub>2</sub> catalysts as a function of tertiary metal concentration. **Key:** Au(4d) (red), Pd<sup>0</sup> (blue), Pd<sup>2+</sup> (magenta), Ca<sup>2+</sup> (green).

**Table S.3.** Comparison of catalytic selectivity towards H<sub>2</sub>O<sub>2</sub> at iso-conversion.

| Catalyst                                                          | Reaction time / min | H <sub>2</sub> Conversion / % | H <sub>2</sub> O <sub>2</sub> Selectivity / % | Productivity / mol <sub>H<sub>2</sub>O<sub>2</sub></sub> kg <sub>cat</sub> <sup>-1</sup> h <sup>-1</sup> | H <sub>2</sub> O <sub>2</sub> Conc. / wt. % |
|-------------------------------------------------------------------|---------------------|-------------------------------|-----------------------------------------------|----------------------------------------------------------------------------------------------------------|---------------------------------------------|
| 1%AuPd <sub>(1.00)</sub> /TiO <sub>2</sub>                        | 30                  | 12                            | 59                                            | 61                                                                                                       | 0.125                                       |
|                                                                   | 60                  | 22                            | 55                                            | 51                                                                                                       | 0.207                                       |
|                                                                   | 75                  | 32                            | 47                                            | 51                                                                                                       | 0.258                                       |
| 1%AuPd <sub>(0.975)</sub> Ni <sub>(0.025)</sub> /TiO <sub>2</sub> | 30                  | 32                            | 41                                            | 107                                                                                                      | 0.215                                       |
| 1%AuPd <sub>(0.975)</sub> Cu <sub>(0.025)</sub> /TiO <sub>2</sub> | 30                  | 31                            | 40                                            | 94                                                                                                       | 0.188                                       |
| 1%AuPd <sub>(0.975)</sub> Zn <sub>(0.025)</sub> /TiO <sub>2</sub> | 30                  | 24                            | 50                                            | 98                                                                                                       | 0.197                                       |

**H<sub>2</sub>O<sub>2</sub> direct synthesis reaction conditions:** Catalyst (0.01 g), H<sub>2</sub>O (2.9 g), MeOH (5.6 g), 5% H<sub>2</sub>/CO<sub>2</sub> (420 psi), 25% O<sub>2</sub>/CO<sub>2</sub> (160 psi), 0.5 h, 2° C, 1200 rpm. **Note:** Values in parentheses refer to metal loading of (Au+Pd) or tertiary metal. In all instances total metal loading is 1 wt.% and Au: Pd: X = 1: 1 (mol/mol).

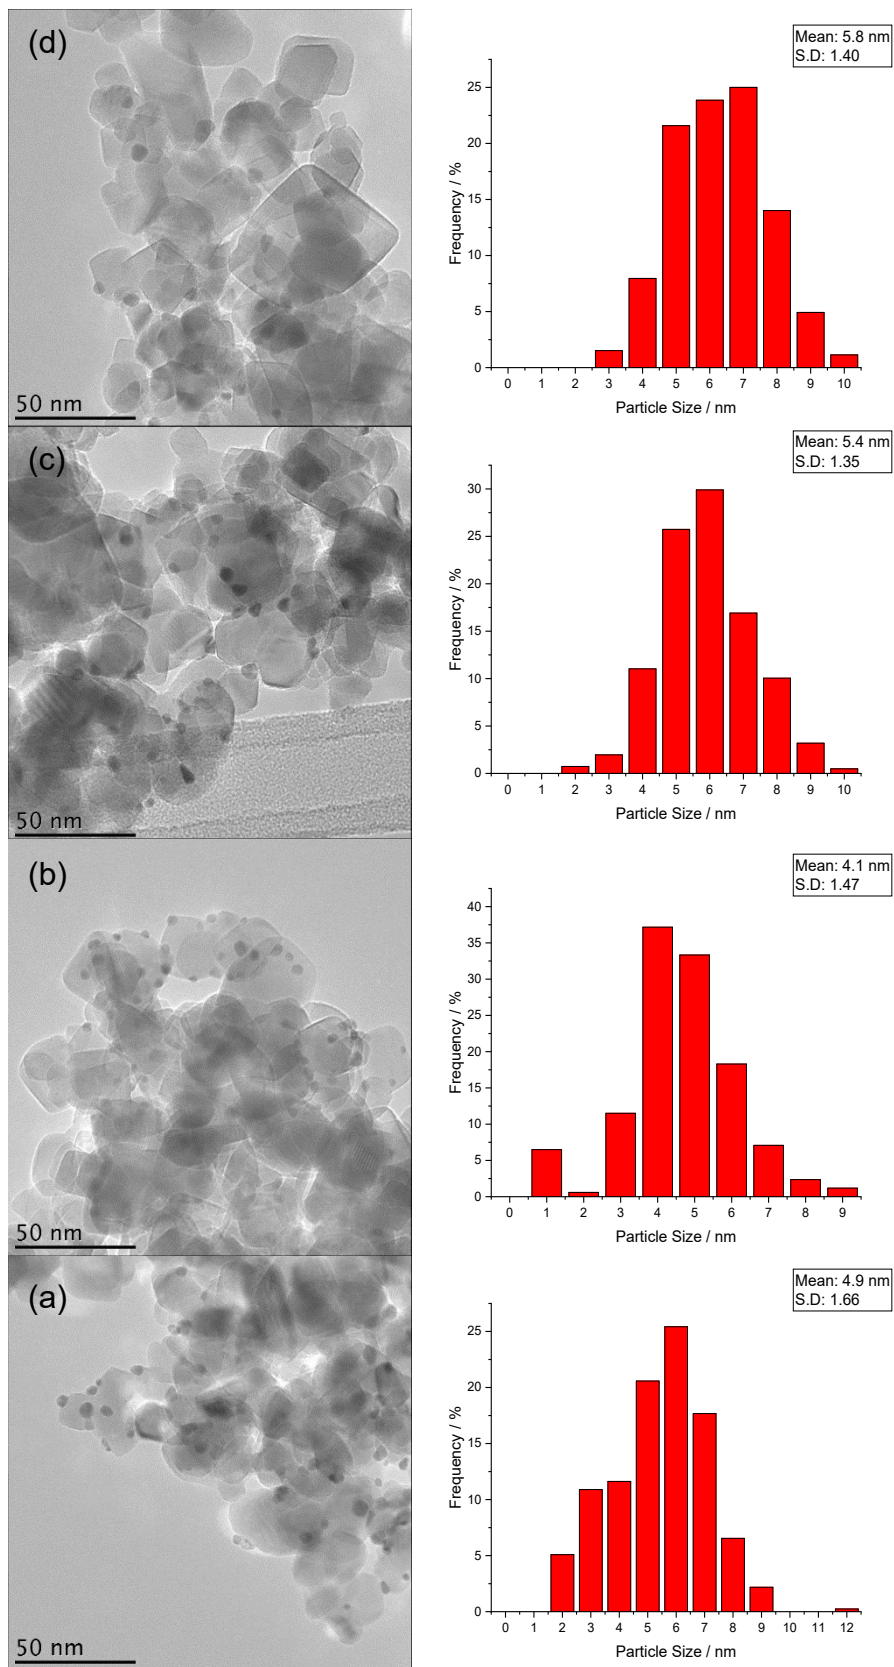

**Figure S.4.** Representative bright field transmission electron micrographs and corresponding particle size histograms of TiO<sub>2</sub> supported tri-metallic catalysts, prepared by a sol-immobilisation methodology. **(a)** 1% AuPd<sub>(1.00)</sub>/TiO<sub>2</sub>, **(b)** 1% AuPd<sub>(0.975)</sub>Ni<sub>(0.025)</sub>/TiO<sub>2</sub>, **(c)** 1% AuPd<sub>(0.975)</sub>Cu<sub>(0.025)</sub>/TiO<sub>2</sub>, **(d)** 1% AuPd<sub>(0.975)</sub>Zn<sub>(0.025)</sub>/TiO<sub>2</sub>.

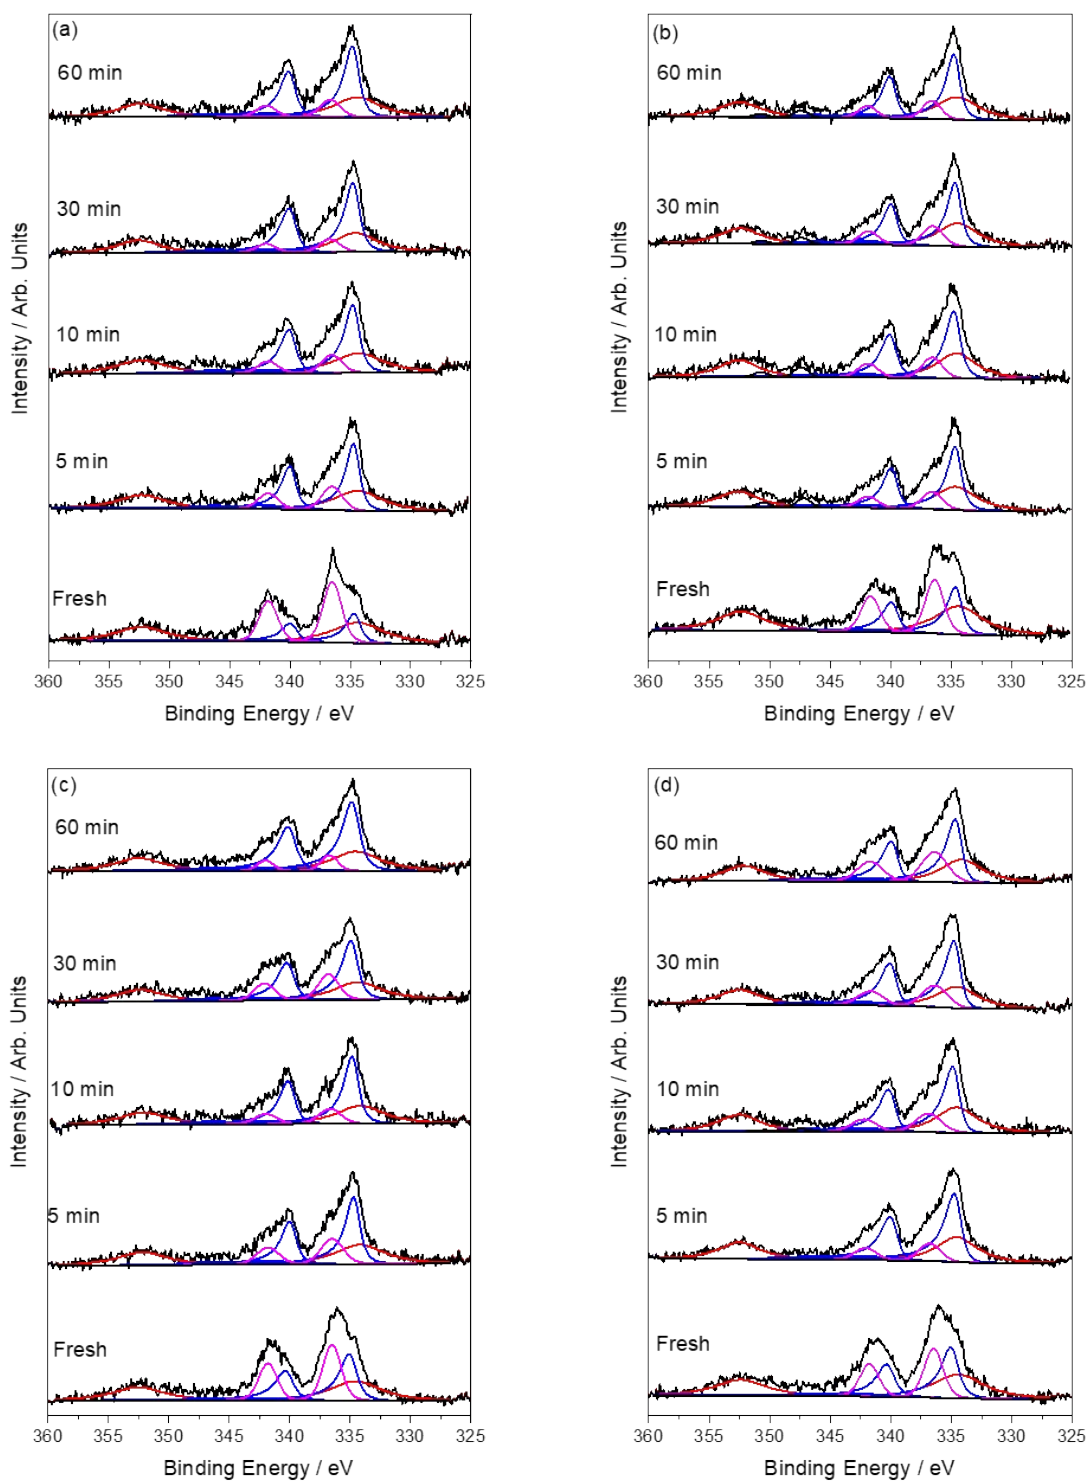

**Figure S.5.** XPS spectra of Pd(3d) regions for **(a)** 1% $\text{AuPd}_{(1.00)}/\text{TiO}_2$ , **(b)** 1% $\text{AuPd}_{(0.975)}\text{Ni}_{(0.025)}/\text{TiO}_2$ , **(c)** 1% $\text{AuPd}_{(0.975)}\text{Zn}_{(0.025)}/\text{TiO}_2$  and **(d)** 1% $\text{AuPd}_{(0.975)}\text{Cu}_{(0.025)}/\text{TiO}_2$  catalysts as a function of reaction time. **Key:** Au(4d) (red), Pd<sup>0</sup> (blue), Pd<sup>2+</sup> (magenta). **H<sub>2</sub>O<sub>2</sub> direct synthesis reaction conditions:** Catalyst (0.01g), H<sub>2</sub>O (2.9g), MeOH (5.6g), 5% H<sub>2</sub> / CO<sub>2</sub> (420 psi), 25% O<sub>2</sub> / CO<sub>2</sub> (160 psi), 2 °C 1200 rpm. **Note:** Used catalysts are dried under vacuum (30 °C, 16 h) prior to subsequent utilisation in the direct synthesis of H<sub>2</sub>O<sub>2</sub> or XPS analysis.



**Table S.4.** Comparison of initial H<sub>2</sub>O<sub>2</sub> synthesis rates over various TiO<sub>2</sub> supported catalysts.

| Catalyst                                                          | Rate of reaction / mmol <sub>H<sub>2</sub>O<sub>2</sub></sub> mmol <sub>metal</sub> <sup>-1</sup> min <sup>-1</sup> |        |        |        |
|-------------------------------------------------------------------|---------------------------------------------------------------------------------------------------------------------|--------|--------|--------|
|                                                                   | Use 1                                                                                                               |        | Use 2* |        |
|                                                                   | 5 min                                                                                                               | 30 min | 5 min  | 30 min |
| 1%AuPd <sub>(1.00)</sub> /TiO <sub>2</sub>                        | 16.40                                                                                                               | 14.06  | 18.22  | 10.54  |
| 1%AuPd <sub>(0.975)</sub> Ni <sub>(0.025)</sub> /TiO <sub>2</sub> | 57.19                                                                                                               | 25.16  | 43.43  | 22.37  |
| 1%AuPd <sub>(0.975)</sub> Cu <sub>(0.025)</sub> /TiO <sub>2</sub> | 41.87                                                                                                               | 21.39  | 28.37  | 18.94  |
| 1%AuPd <sub>(0.975)</sub> Zn <sub>(0.025)</sub> /TiO <sub>2</sub> | 41.86                                                                                                               | 23.30  | 36.77  | 18.40  |

\*Catalyst used for 30 min under standard reaction conditions prior to determination of reaction rate over 0.083 or 0.5 h. **H<sub>2</sub>O<sub>2</sub> direct synthesis reaction conditions:** Catalyst (0.01g), H<sub>2</sub>O (2.9g), MeOH (5.6g), 5% H<sub>2</sub> / CO<sub>2</sub> (420 psi), 25% O<sub>2</sub> / CO<sub>2</sub> (160 psi), 2 °C 1200 rpm. **Note 1:** Reaction rates upon first use (use 1) are calculated based on the actual metal loading as determined by HF digestion (see Table S.2). Reaction rates upon second use (use 2) account for metal leaching during the initial H<sub>2</sub>O<sub>2</sub> synthesis reaction, as determined by ICP-MS analysis of the post reaction solutions (see Table 4). **Note 2:** Values in parentheses refer to metal loading of (Au+Pd) or tertiary metal. In all instances total metal loading is 1 wt.% and Au: Pd: X = 1: 1 (mol/mol).

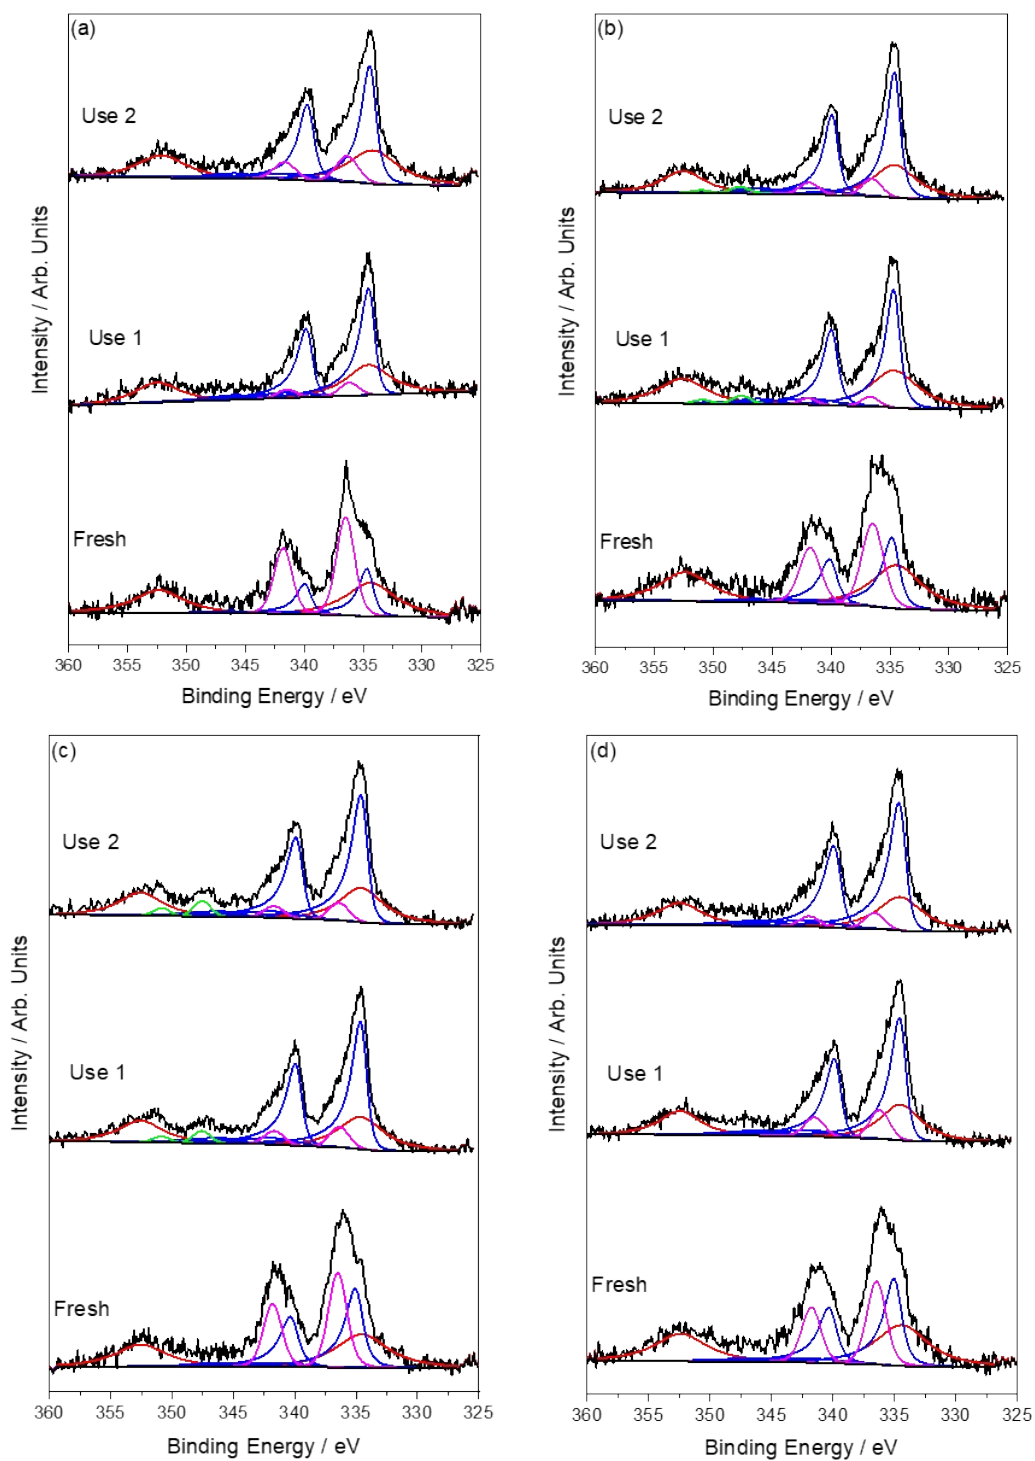

**Figure S.6.** XPS spectra of Pd(3d) regions for the as-prepared **(a)** 1%AuPd<sub>(1.00)</sub>/TiO<sub>2</sub>, **(b)** 1%AuPd<sub>(0.975)</sub>Ni<sub>(0.025)</sub>/TiO<sub>2</sub>, **(c)** 1%AuPd<sub>(0.975)</sub>Zn<sub>(0.025)</sub>/TiO<sub>2</sub> and **(d)** 1%AuPd<sub>(0.975)</sub>Cu<sub>(0.025)</sub>/TiO<sub>2</sub> catalysts in addition to corresponding spectra after one and two uses in the direct synthesis of H<sub>2</sub>O<sub>2</sub>. **Key:** Au(4d) (red), Pd<sup>0</sup> (blue), Pd<sup>2+</sup> (magenta), Ca<sup>2+</sup> (green). The presence of Ca<sup>2+</sup> is considered to originate from the reaction mixture. **H<sub>2</sub>O<sub>2</sub> direct synthesis reaction conditions:** Catalyst (0.01g), H<sub>2</sub>O (2.9g), MeOH (5.6g), 5% H<sub>2</sub> / CO<sub>2</sub> (420 psi), 25% O<sub>2</sub> / CO<sub>2</sub> (160 psi), 0.5 h, 2 °C 1200 rpm. **Note:** Used catalysts are dried under vacuum (30 °C, 16 h) prior to subsequent utilisation in the direct synthesis of H<sub>2</sub>O<sub>2</sub> or XPS analysis.

**Table S.5.** Effect of catalyst use in the direct synthesis of H<sub>2</sub>O<sub>2</sub> on atomic speciation as determined by XPS.

| Catalyst                                                          | As prepared |                                    | Use 1  |                                    | Use 2  |                                    |
|-------------------------------------------------------------------|-------------|------------------------------------|--------|------------------------------------|--------|------------------------------------|
|                                                                   | Au: Pd      | Pd <sup>2+</sup> : Pd <sup>0</sup> | Au: Pd | Pd <sup>2+</sup> : Pd <sup>0</sup> | Au: Pd | Pd <sup>2+</sup> : Pd <sup>0</sup> |
| 1%AuPd <sub>(1.00)</sub> /TiO <sub>2</sub>                        | 0.56        | 1.56                               | 0.50   | 0.10                               | 0.47   | 0.20                               |
| 1%AuPd <sub>(0.975)</sub> Ni <sub>(0.025)</sub> /TiO <sub>2</sub> | 0.58        | 0.91                               | 0.55   | 0.20                               | 0.53   | 0.14                               |
| 1%AuPd <sub>(0.975)</sub> Cu <sub>(0.025)</sub> /TiO <sub>2</sub> | 0.46        | 0.63                               | 0.40   | 0.18                               | 0.55   | 0.10                               |
| 1%AuPd <sub>(0.975)</sub> Zn <sub>(0.025)</sub> /TiO <sub>2</sub> | 0.39        | 0.77                               | 0.36   | 0.09                               | 0.59   | 0.08                               |

**H<sub>2</sub>O<sub>2</sub> direct synthesis reaction conditions:** Catalyst (0.01g), H<sub>2</sub>O (2.9g), MeOH (5.6g), 5% H<sub>2</sub> / CO<sub>2</sub> (420 psi), 25% O<sub>2</sub> / CO<sub>2</sub> (160 psi), 0.5 h, 2 °C 1200 rpm. **Note1:** All catalysts exposed to an oxidative heat treatment (400 °C, 3 h, static air, ramp rate = 10°Cmin<sup>-1</sup>). **Note 2:** Used catalysts are dried under vacuum (30 °C, 16 h) prior to subsequent utilisation in the direct synthesis of H<sub>2</sub>O<sub>2</sub> or XPS analysis. **Note3:** values in parentheses refer to metal loading of (Au+Pd) or tertiary metal. In all instances total metal loading is 1 wt.% and Au: Pd: X = 1: 1 (mol/mol).
